# Supplementary material for: Modeling an Evolutionary Conserved Circadian Cis-Element
Source: PLOS journal article supplement (doi:10.1371/journal.pcbi.0040038), 2008-02-13
Supplement: S1 (10.1371/journal.pcbi.0040038.s001) [file journal.pcbi.0040038.s001]

Fig. S1

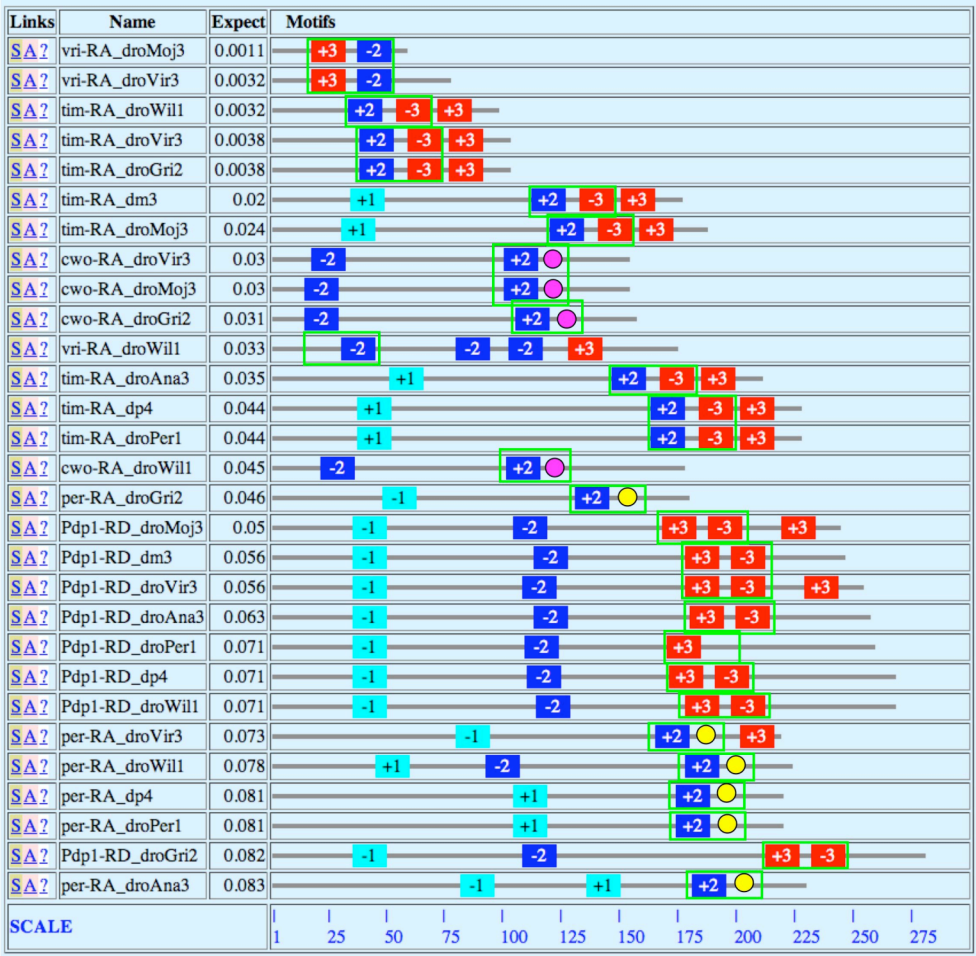

**Figure S1.** MEME analysis of sequences surrounding conserved CACGTG in five circadian genes in fly.

Motif analysis for sequences consisting of conserved CACGTG motifs (present in the UCSC multiple alignments in at least in the subclade consisting of *D. melanogaster*, *D. yakuba*, *D. simulans*, *D. sechellia* and *D. erecta*) plus their 30 bp flanks on each side. To avoid overcrowding with redundant species we hide the *D. yakuba*, *D. simulans*, *D. sechellia* and *D. erecta* sequences. The MEME program was run with the command ‘meme -dna -mod zoops -nmotifs 3 -w 7 -revcomp’, The output shown is from the companion program MAST with command ‘mast -ev 0.1 -mt 0.0005’. The motifs indicated by boxes correspond to consensus ACACGTG (1), CACGTGT (2), CACGTTT (3); green rectangles indicate the E1 and E2 partner sites. The yellow circle indicate the TGC GTG variant in the *per* sequences, and the purple variant TTATGTG in that in *cwo* sequences. This analysis indicates the putative role of the double E-box like structure and motivates the double site structure that we train more systematically with the HMM approach.
