# Supplementary material for: Modeling an Evolutionary Conserved Circadian Cis-Element
Source: PLOS journal article supplement (doi:10.1371/journal.pcbi.0040038), 2008-02-13
Supplement: S2 (10.1371/journal.pcbi.0040038.s002) [file journal.pcbi.0040038.s002]

Fig. S2

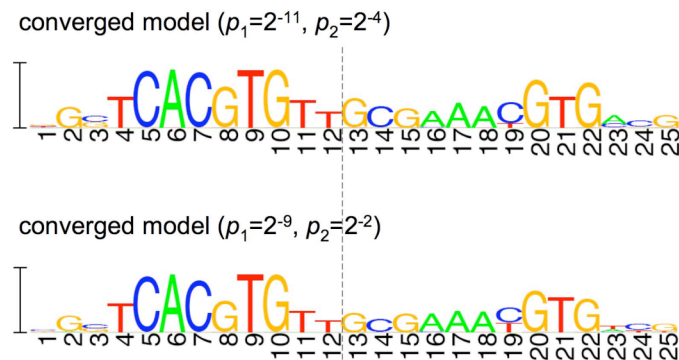

**Figure S2.** Models obtained with different transitions probabilities  $p_1$  and  $p_2$ .

Top: model from Fig. 2A ( $p_1=2^{-11}$ ,  $p_2=2^{-4}$ ). The converged model uses approximately 15 high scoring instances of the E1 box and 6 for the E2 box in the training sequences (Methods). Bottom: ( $p_1=2^{-9}$ ,  $p_2=2^{-2}$ ), here the converged model uses 24 high scoring instances of E1 box and 10 for the E2 box. Both models are given at <http://circaclock.epfl.ch/Models>. Dashed line indicates the separation between E1 and E2.
