# Supplementary material for: Modeling an Evolutionary Conserved Circadian Cis-Element
Source: PLOS journal article supplement (doi:10.1371/journal.pcbi.0040038), 2008-02-13
Supplement: S4 (10.1371/journal.pcbi.0040038.s004) [file journal.pcbi.0040038.s004]

Fig. S4 A

A: GR-Clk

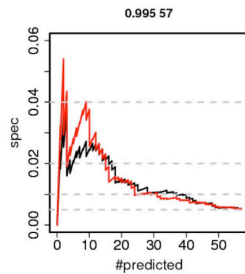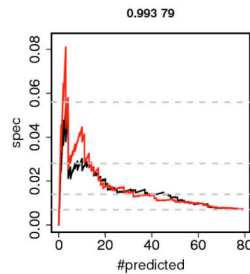

C: DD cyclers

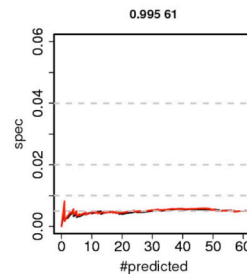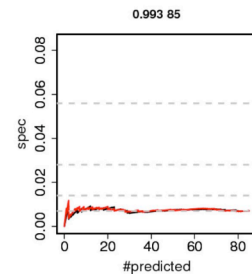

B: Clk<sup>Jrk</sup>

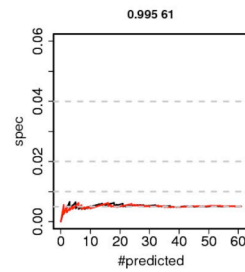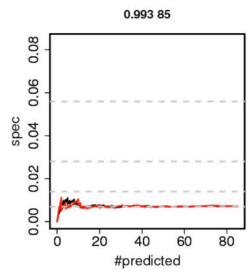

D: LD cyclers

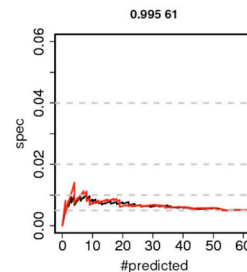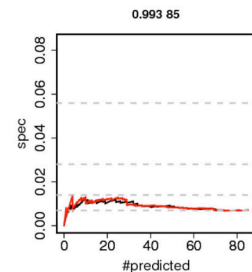

Fig. S4 B

DD cyclers (heads)

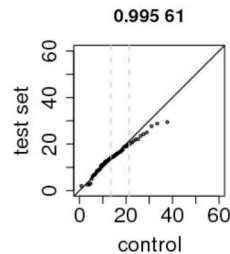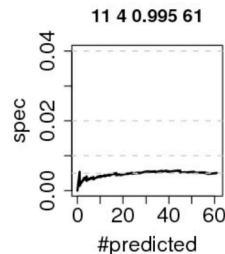

Clk<sup>Jrk</sup> mutant

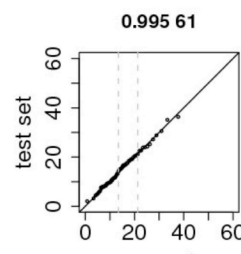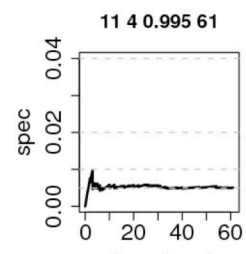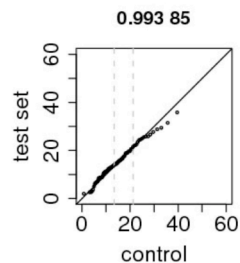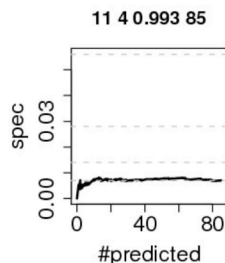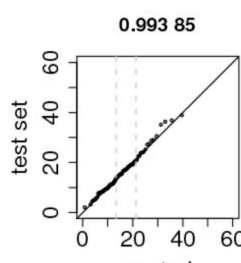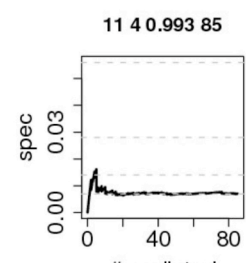

**Figure S4.** In *Drosophila* E1-E2 signal is not enriched in cyclic genes or genes which are downregulated in *Clock*<sup>Jrk</sup> flies.

**A:** Specificities of the E1-E2 signal in four different experiments and comparison of E1-E2 model (black) with E1 model alone (red). The top 0.5% (and 0.7% genes) in the GR-CLK induction experiment, down-regulation in *Clock*<sup>Jrk</sup> mutants, and cycling (measured as 24h Fourier scores) in

entrained LD (light-dark) or free-run DD (dark-dark) conditions, are used to define the set of positives (Methods). Only the GR-CLK induction shows a sign of enriched sequence motifs. In this experiments the E2 box seems not to increase specificity much. A closer inspection shows that specificity in the presence of E2 is in fact reduced for low sensitivities (<10 predicted genes), but that the black and red curves crossover and that the black is slightly more specific for larger sensitivities. The five training genes are removed from this analysis.

**B:** Quantile-quantile plots of the scores and specificity assessment in *Clock<sup>Jrk</sup>* repressed genes and DD cyclers for the E1-E2 model (compare with Fig. 3).
