# Supplementary material for: Modeling an Evolutionary Conserved Circadian Cis-Element
Source: PLOS journal article supplement (doi:10.1371/journal.pcbi.0040038), 2008-02-13
Supplement: S5 (10.1371/journal.pcbi.0040038.s005) [file journal.pcbi.0040038.s005]

Fig. S5

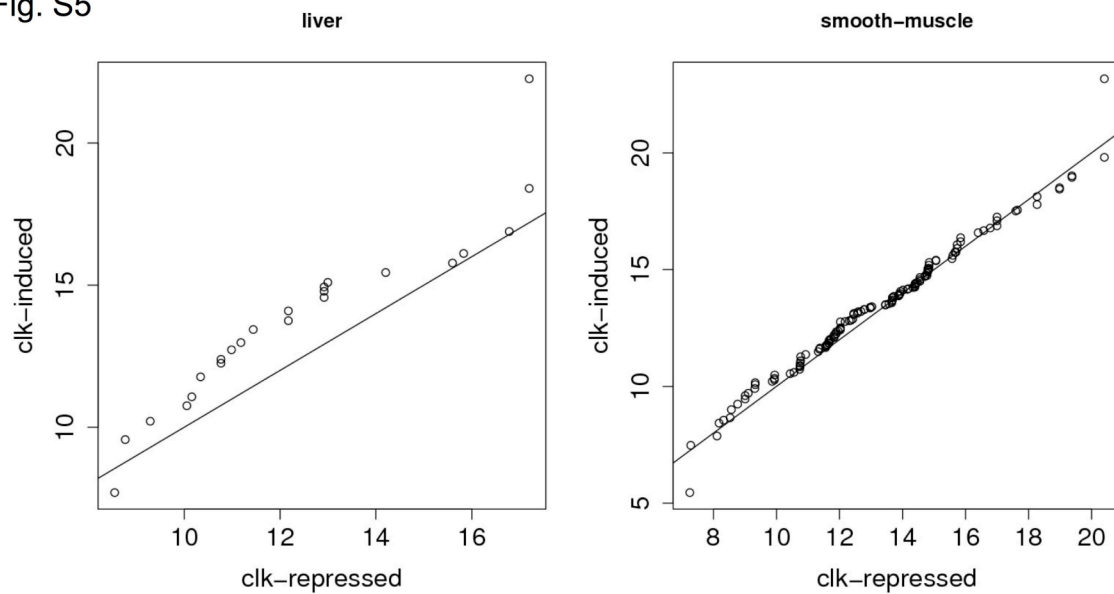

**Figure S5.** E1-E2 enhancers in  $\Delta 19$  *Clock* mutants.

Specificity of the E1-E2 signal in *Clock* mutants in liver (left) and smooth muscle (right). CLOCK/BMAL1-induced or repressed genes are taken from the supplementary material in (Miller, 2007). While the liver samples show a weak tendency for CLOCK/BMAL1-induced genes to show stronger E1-E2 sites, the smooth muscle data does not discriminate between repressed or induced genes.

#### References

Miller BH, McDearmon EL, Panda S, Hayes KR, Zhang J, et al. (2007) Circadian and CLOCK-controlled regulation of the mouse transcriptome and cell proliferation. *Proc Natl Acad Sci U S A* 104: 3342-3347
