# Supplementary material for: Modeling an Evolutionary Conserved Circadian Cis-Element
Source: PLOS journal article supplement (doi:10.1371/journal.pcbi.0040038), 2008-02-13
Supplement: S6 (10.1371/journal.pcbi.0040038.s006) [file journal.pcbi.0040038.s006]

Fig. S6

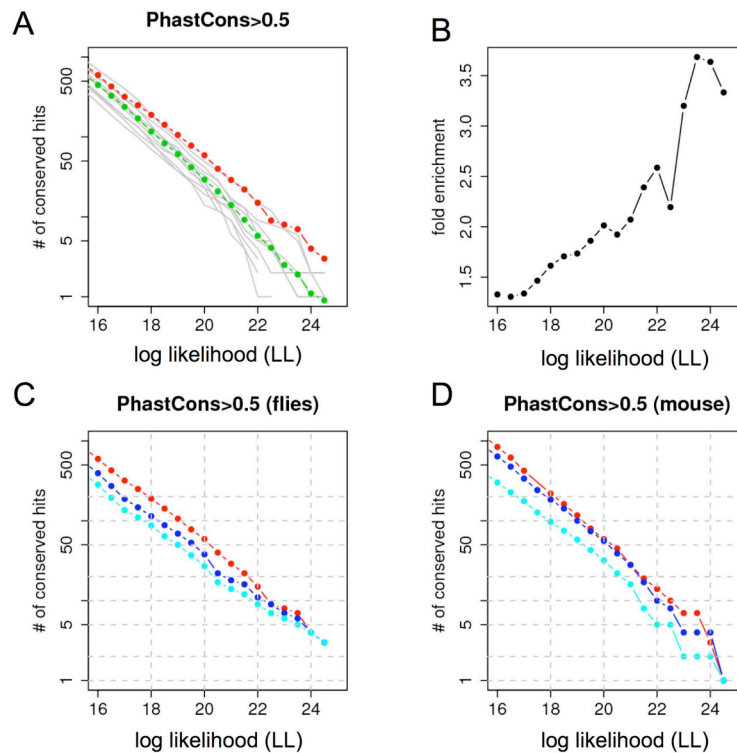

**Figure S6.** Estimated number of E1-E2 sites in flies and mouse.

**A.** Number of conserved hits on the *D. Melanogaster* genome with PhastCons score higher than 0.5 in function of the likelihood score (x-axis). We show the original E1-E2 matrices (red) and ten randomly permuted versions (gray lines) with their average (green).

**B.** Enrichment observed for the real E1-E2 matrix as compared to the mean of the permuted models from A (red divided by green).

**C. *D. melanogaster*:** Number of conserved (PhastCons>0.5, from genome version dm3, 15 species) hits anywhere (red), in the +/-2.5kb regions around TSSs (blue), and number of genes with at least one hit in the TSS region (cyan).

**D. Mouse:** number of conserved (PhastCons>0.5, mm8 17 species) hits anywhere (red), in the +/-2kb regions around genes (from the MOE430 table, cf. Methods) (blue), and in smaller regions consisting of +/- 2kb around the TSS (cyan).
