# Supplementary material for: Modeling an Evolutionary Conserved Circadian Cis-Element
Source: PLOS journal article supplement (doi:10.1371/journal.pcbi.0040038), 2008-02-13
Supplement: S7 (10.1371/journal.pcbi.0040038.s007) [file journal.pcbi.0040038.s007]

Fig. S7A

*Rev-erba*

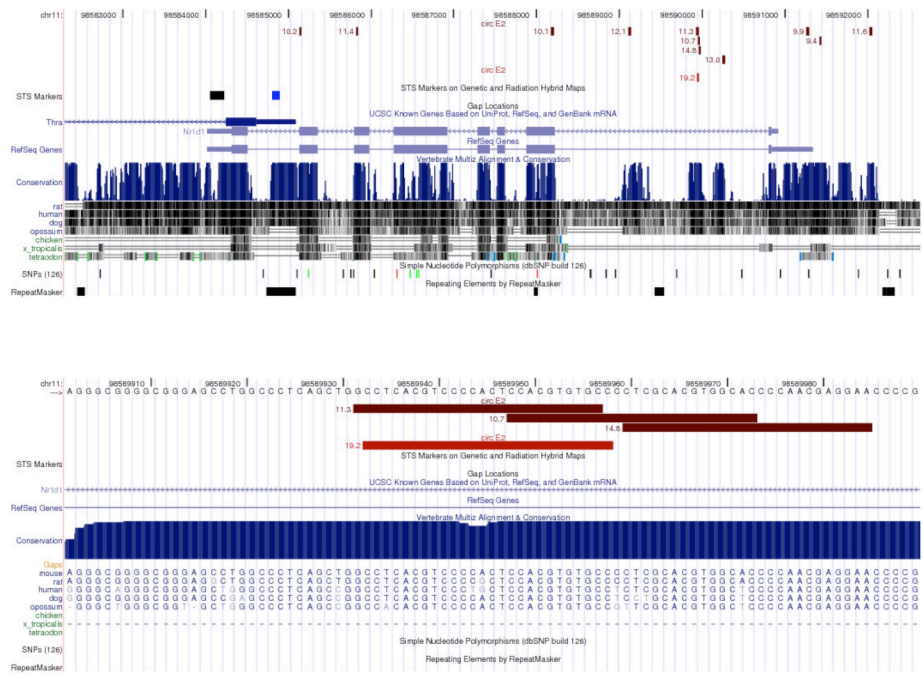

Fig. S7B

*Per1*

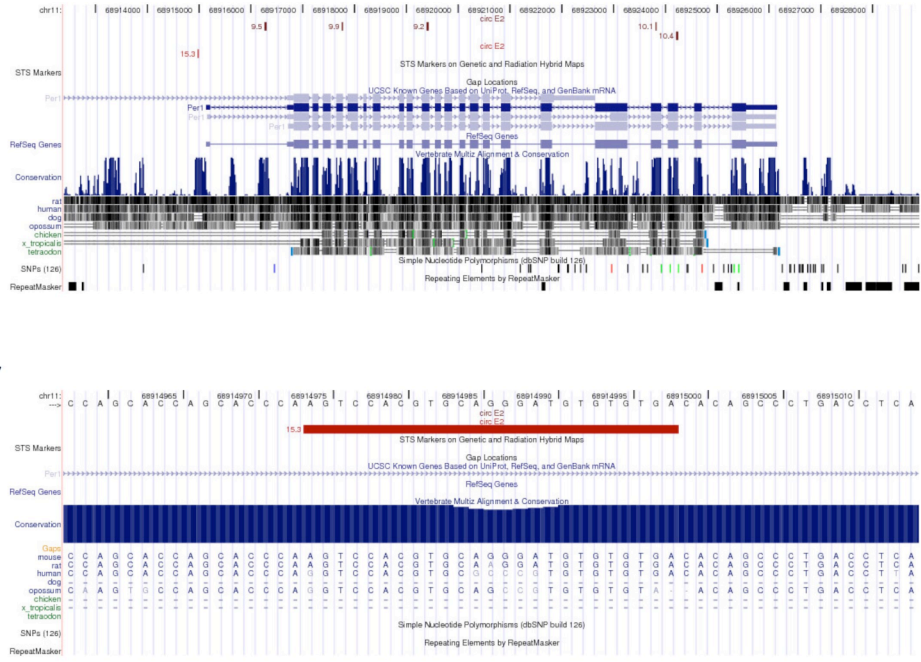

*Per2*

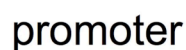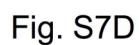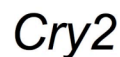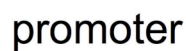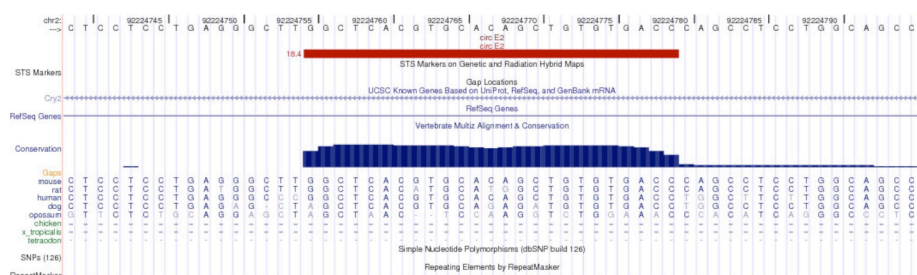

intron 3

Fig. S7E

*Dbp*

promoter

intron 1

*Dbp* intron 2

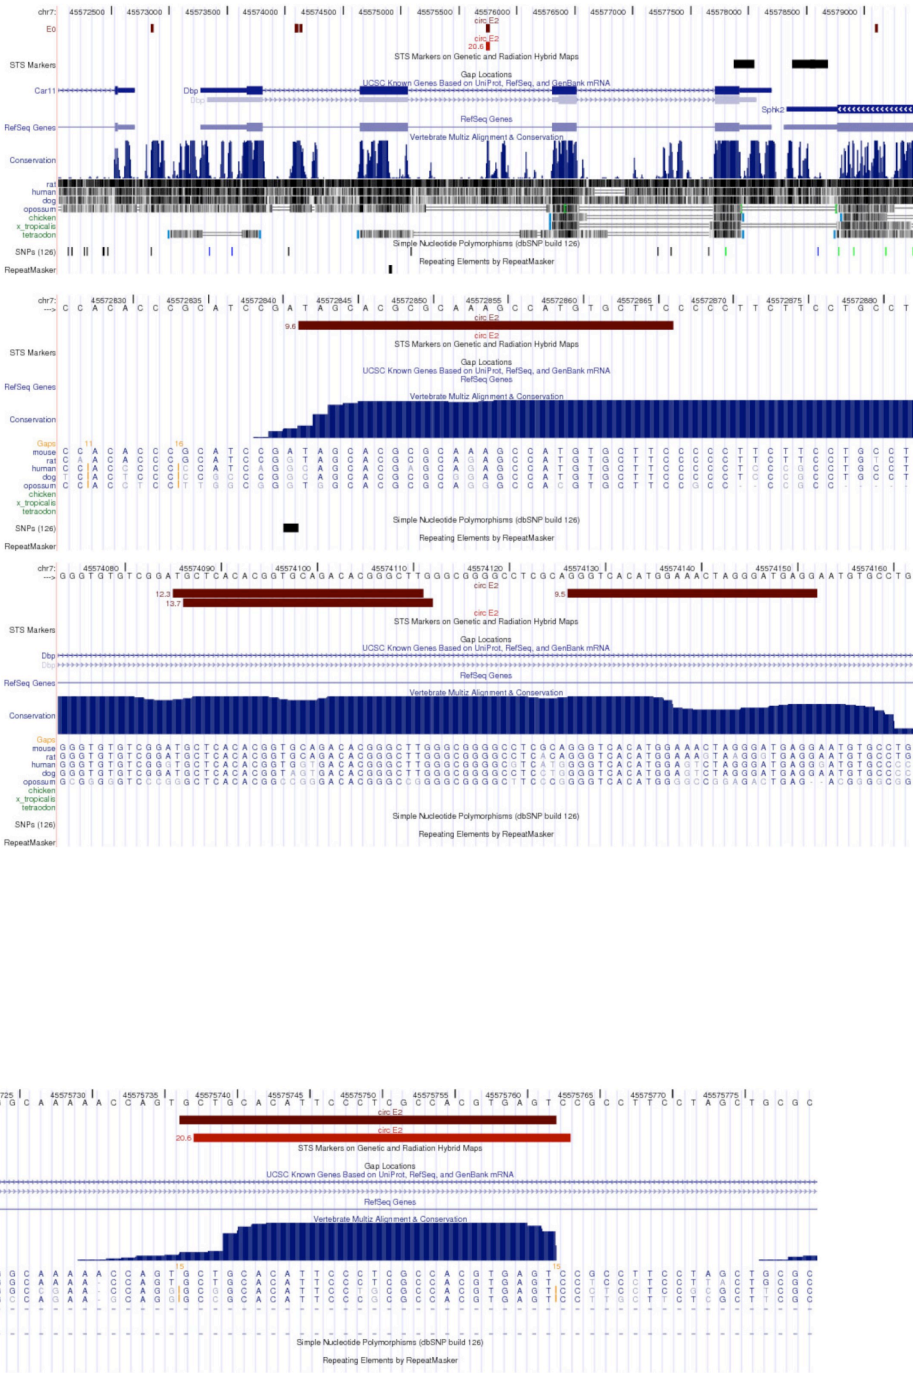



Fig. S7F

Wee1

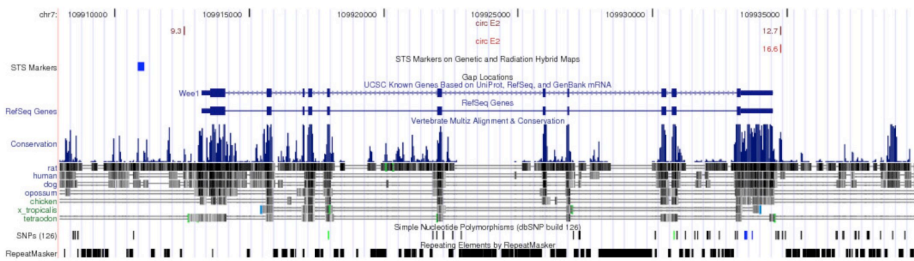

3' end

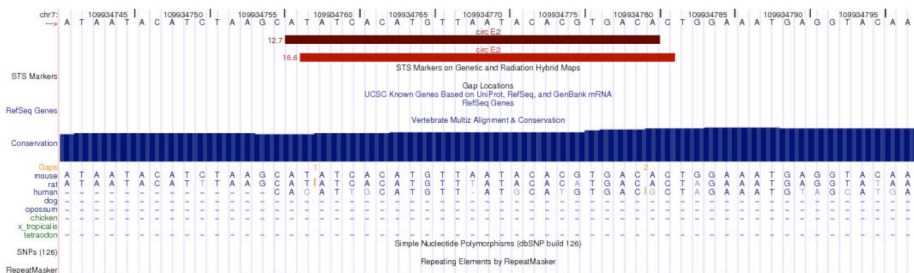

Fig. S7G

Tef

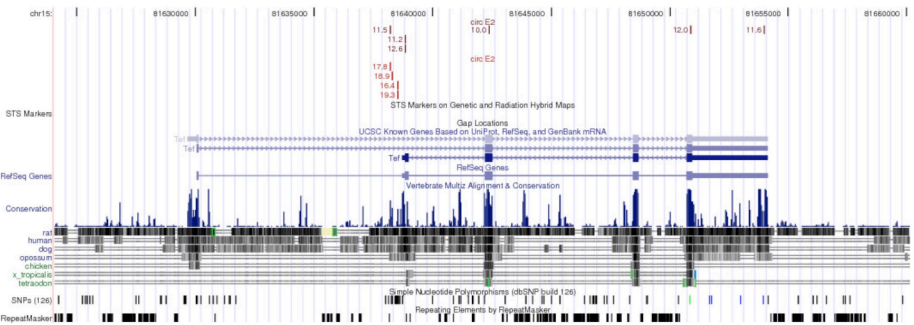

promoter

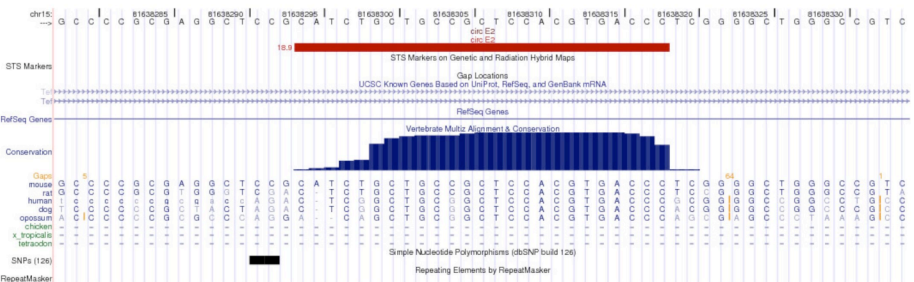

promoter

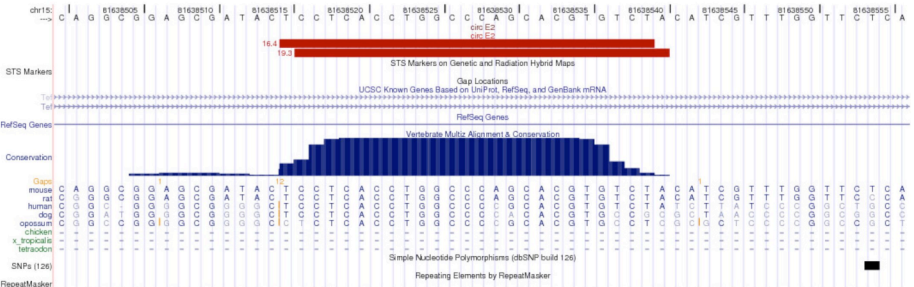



*Hlf*

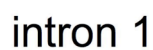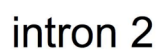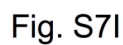

*Bhlhb2*

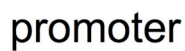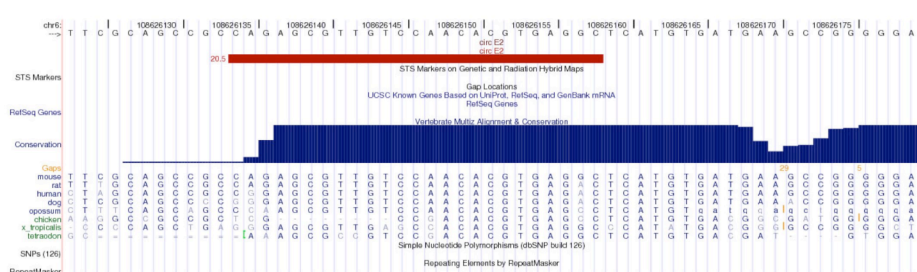

**Figure S7.** Position of E1-E2 enhancers in circadian mouse genes.

Plots are from the UCSC genome browser with our hit file (available as mouse-scan\_conserved.bed) uploaded as a custom track. Hits with score between 9-15 bits are shown in dark red and hits above 15 bits in bright red. For each gene we show a large-scale overview and zoomed views that emphasize the conservation profiles. Since the E1-E2 sequence is nearly palindromic, we often find hits that are doubled but offset by one base (e.g. the *Per2* gene, panel C). Alignments are from the UCSC mm8 genome version.
