# Supplementary material for: Modeling an Evolutionary Conserved Circadian Cis-Element
Source: PLOS journal article supplement (doi:10.1371/journal.pcbi.0040038), 2008-02-13
Supplement: S10 (10.1371/journal.pcbi.0040038.s010) [file journal.pcbi.0040038.s010]

Fig. S10

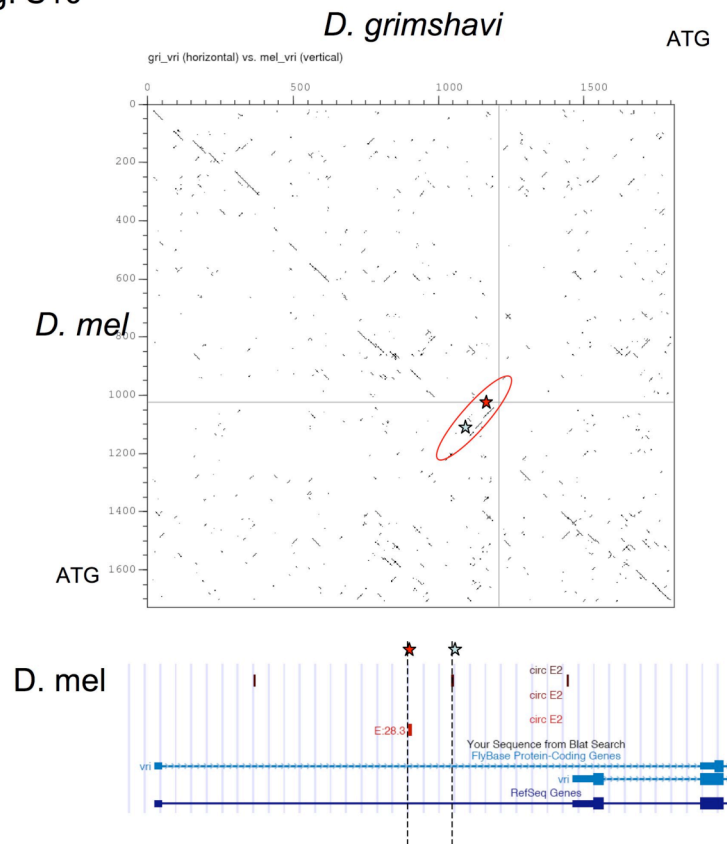

**Figure S10.** Sequence inversion in the *D. Grimshawi vriille* promoter.

A fragment in the *D. grimshawi vri* promoter harboring two conserved E1-E2 instances, (\* and +, Fig. S2C) is inverted with respect to all other species. This explains why the Grimshawi sequence is missing from the UCSC multiple alignment in Fig. S2C.
